# **From space to time: Spatial inhomogeneities lead to the emergence of spatio-temporal activity sequences in spiking neuronal networks**

Sebastian Spreizer<sup>1,2</sup>, Ad Aertsen<sup>1,2</sup>, Arvind Kumar<sup>1,2</sup>

<sup>1</sup>Faculty of Biology, University of Freiburg, Germany

<sup>2</sup>Bernstein Center Freiburg, University of Freiburg, Germany

<sup>3</sup>\*Computational Science and Technology, School of Electrical Engineering and Computer Science, KTH Royal Institute of Technology, Stockholm, Sweden

\* Corresponding author: Arvind Kumar - arvkumar@kth.se

## **Abstract**

Spatio-temporal sequences of neuronal activity are observed in many brain regions in a variety of tasks and are thought to form the basis of any meaningful behavior. Mechanisms by which a neuronal network can generate spatio-temporal activity sequences have remained obscure. Existing models are biologically untenable because they require manual embedding of a feedforward network within a random network or supervised learning to train the connectivity of a network to generate sequences. Here, we propose a biologically plausible, generative rule to create spatio-temporal activity sequences in a network model of spiking neurons with distance dependent connectivity. We show that the emergence of spatio-temporal activity sequences requires: (1) individual neurons preferentially project a small fraction of their axons in a specific direction, and (2) the preferential projection direction of neighboring neurons is similar. Thus, an anisotropic but correlated connectivity of neuron groups suffices to generate spatio-temporal activity sequences in an otherwise random neuronal network model.

## **1 Introduction**

2 Ordered sequences of actions are the key to any meaningful behavior. This implies that the  
3 task-related neuronal spiking activity in the responsible areas of the brain must also be ordered  
4 in temporal activity sequences (Hebb 1949). Indeed, temporal activity sequences have been  
5 recorded from different brain regions in various tasks (Hahnloser et al. 2002; Ikegaya et al.

6 2004; Luczak et al. 2007; Jin et al. 2009; Pastalkova et al. 2008; Harvey et al. 2012; Modi  
7 et al. 2014; Bakhurin et al. 2017) (see review by (Bhalla 2017)). Depending on the arousal  
8 state of the animal and on the behavioral task, the time scales of the activity sequence may  
9 range from few milliseconds to few seconds. The necessity and the ubiquity of the sequential  
10 activity patterns in the brain raises the question: what is the origin of such activity sequences  
11 in locally random, sparsely connected networks of noisy neurons?

12 At the simplest, activity sequences of neurons may be attributed to their external inputs.  
13 When neurons are tuned to specific properties of an external input, a sequential change in  
14 the input can lead to an activity sequence, e.g. temporally ordered firing of place cells in the  
15 hippocampus (Dragoi and Tonegawa 2011). However, activity sequences have been observed  
16 in several tasks, not involving any specific external stimuli, e.g. in decision making (Jin et al.  
17 2009; Harvey et al. 2012), in learning (Modi et al. 2014), in memory recall (Pastalkova et al.  
18 2008), and in generating bird songs (Hahnloser et al. 2002). These experiments suggest that  
19 neuronal networks in the brain are able to generate neuronal activity sequences using some  
20 intrinsic mechanisms.

21 Several computational network models have been proposed to explain the emergence of spon-  
22 taneous or cue-evoked activity sequences. A feedforward network model (Kumar et al. 2010)  
23 is the simplest model that can generate activity sequences, either spontaneously or in response  
24 to a short input pulse (Abeles 1991; Diesmann et al. 1999; Kumar et al. 2008). However, given  
25 the random and recurrent connectivity in the brain, this architecture is biologically untenable.  
26 Recurrent network models with an asymmetric spatial connectivity can exhibit traveling waves  
27 (Rinzel et al. 1998; Hutt and Atay 2005; Roxin et al. 2005), which can be considered as a  
28 temporal activity sequence. However, in this dynamical regime a network can generate only a  
29 single activity sequence, propagating always in the same direction. Recurrent networks tuned  
30 to exhibit attractor dynamics (Rabinovich et al. 2006) can generate more diverse temporal  
31 activity sequences in response to an external input which steers the spiking activity from one  
32 attractor state to another (Zhang 2009). Alternatively, an adaptation in neuronal spiking ac-  
33 tivity or an activity-dependent short-term-depression of synapses could also be used to create  
34 a mechanism to generate activity sequences (Murray and Escola 2017). While such mecha-  
35 nisms provide a natural way to produce both fast and slow sequences, it does not allow for  
36 controlling the spatial direction of the activity sequence in a reliable manner. It was shown to

37 be possible to wire the connectivity among neurons representing different attractor states in  
38 a way that attractor states switched from one to another in a sequential manner (Murray and  
39 Escola 2017). However, it remains unclear how a connectivity necessary for such switching can  
40 be achieved. Beyond these networks exhibiting attractor dynamics, more generic echo-state-  
41 networks have been trained using a supervised learning algorithm to generate an arbitrary  
42 temporal sequence of neuronal activity (Rajan et al. 2016). Thus, at present computational  
43 models to generate neuronal activity sequences had to make biologically implausible assump-  
44 tions as they either required a prewired network connectivity (feedforward network or wiring  
45 among different attractor states) or relied on supervised learning (echo-state networks).  
46 Here, we describe a novel mechanism allowing the generation of diverse activity sequences in a  
47 recurrent network model without any specific external inputs, any pre-wired networks nor any  
48 supervised learning. Specifically, we studied the emergence of activity sequences in a neuronal  
49 network with a spatial connectivity profile. We show that when the extent of the spatial  
50 connectivity is asymmetric and varying across neurons, spatio-temporal patterns of spiking  
51 activity emerge. We identified two conditions that ensured the emergence of spatio-temporal  
52 activity sequences (STAS) in such networks of spiking neurons: (1) individual neurons project  
53 a small fraction (approximately 2-5%) of their axons in a preferred direction ( $\phi$ ) and (2)  $\phi$ s for  
54 neighboring neurons were similar, whereas  $\phi$  for neurons further apart were unrelated. These  
55 conditions did not depend on the exact composition of neurons in the network model. Both  
56 purely inhibitory network models and network models composed of excitatory and inhibitory  
57 neurons exhibited STAS, provided the above two conditions were met.

## 58 Results

59 Can a locally connected random network (LCRN) with excitatory and inhibitory (or only  
60 inhibitory) spiking neurons generate STAS in a biologically plausible manner and without  
61 embedding feedforward subnetworks (Kumar et al. 2008) or learning such connectivity using  
62 a supervised learning algorithm (Rajan et al. 2016)? It is well known that LCRNs can exhibit  
63 stable hexagonal patterns of activity bumps (Roxin et al. 2005; Hutt 2008; Spreizer et al.  
64 2017). We hypothesize that such stable spatial activity patterns can be transformed into  
65 STAS if the activity bumps could be destabilized. To this end, we investigated the effect of

66 introducing inhomogeneities in the spatial connectivity between neurons on the stability of  
67 the activity bumps.

## 68 **Spatial distribution of inhomogeneities in neuronal connectivity**

69 We considered an LCRN in which neurons projected a fraction of their axons preferentially  
70 in a particular direction ( $\phi$ ; Figure 1a and Supplementary Figure S2).  $\phi$  was chosen from a  
71 uniform distribution and assigned to each neuron according to four different configurations  
72 (Figure 1b). Random configuration:  $\phi$  was randomly and independently assigned to each  
73 neuron. Perlin configuration:  $\phi$  was assigned to neurons using a gradient noise algorithm  
74 such that neighboring neurons had similar values of  $\phi$ . Homogeneous configuration: the same  
75  $\phi$  was assigned to all neurons. Finally, as a control, we also considered the case in which all  
76 neurons projected in all directions with equal probability (Symmetric configuration).

77 First, we focused on LCRNs with only inhibitory neurons (I-networks). In these I-networks,  
78 we used a connectivity profile which varied non-monotonically with distance, according to  
79 a Gamma distribution (Figure 1a:center; see Methods (Spreizer et al. 2017)). After wiring  
80 the networks according to each of the four configurations described above, we measured the  
81 effective  $\phi$  from the spatial distribution of the post-synaptic targets of each neuron. Results are  
82 shown in Figs. 2a1-a5. For the random and Perlin configurations, the angle  $\phi$  measured from  
83 the location of the post-synaptic neurons was uniformly distributed, as was initially specified.  
84 For the homogeneous configuration all neurons had identical  $\phi$  assigned, but the measured  
85  $\phi$  values for individual neurons were slightly different from the assigned value, due to the  
86 finite numbers of connections per neuron. For the whole network,  $\phi$  was normally distributed  
87 around the assigned value, with a very small variance. In the symmetric configuration  $\phi$  for  
88 the network was uniformly distributed and was different for each neuron, due to the random  
89 nature of the connectivity and the finite numbers of connections per neuron.

90 The in-degree distribution was similar across all four configurations (Figs. 2b1-b5). However,  
91 in the Perlin configuration, as a consequence of the spatial distribution of  $\phi$ , neurons with high  
92 and low in-degree distribution were spatially clustered. Thus, the network models were highly  
93 similar across all four configurations at the level of neuron properties and their connectivities  
94 (same in-degree distribution and fixed out-degree for all neurons).

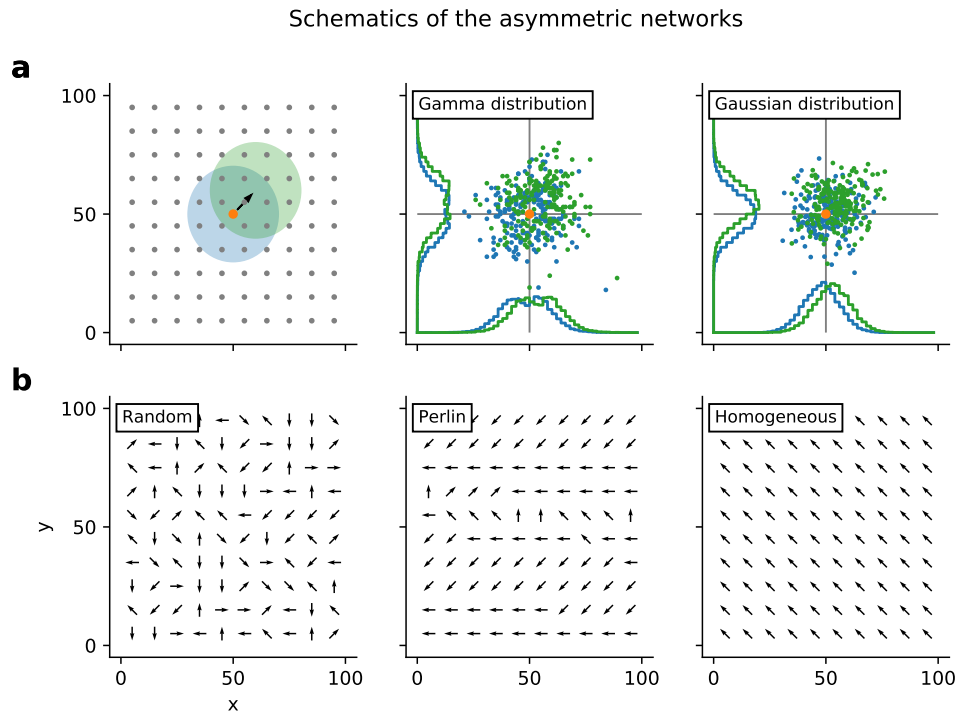

Figure 1: **Schematics of the asymmetric network models (a:left)** Neurons were arranged on a regular 2-D grid, folded to form a torus. The colored circles indicate the symmetric (blue) and asymmetric (green) spatial connectivity schemes. The pre-synaptic neuron is marked by the orange dot. **(a:center)** Locations of post-synaptic neurons chosen according to the symmetric (green) or asymmetric (blue) connectivity. In this case the distance-dependent connectivity profile varied non-monotonically, according to a  $\Gamma$  distribution. This connectivity profile was used for purely inhibitory network models. **(a:right)** Same as in the center panel, but here the distance-dependent connectivity profile varied monotonically, according to a Gaussian distribution. This connectivity profile was used in the present study for network models with both excitatory and inhibitory neurons. **(b)** Schematic of spatial distribution of connection asymmetries. Each arrow shows the direction in which the neuron makes preferentially most connections ( $\phi$ ). Here we show examples for random, Perlin and homogeneous configurations.

## 95 Spatial inhomogeneities lead to the emergence of activity sequences

96 The differences among the four connectivity configurations became evident as we inspected  
97 the corresponding network activity dynamics, obtained by activating each neuron in the net-  
98 work with an independent Gaussian white noise (see Methods). In an LCRN with Perlin  
99 configuration, time-resolved snapshots of the activity showed transient co-activation of neigh-  
100 boring neurons, referred to as spatial activity bumps (Supplementary Figure S3). Importantly,  
101 the spatial bumps were not fixed at a given location, instead as one spatial bump faded,  
102 another, similar bump appeared in its immediate vicinity, and so on, thereby creating STAS.  
103 Because we did not implement short-term synaptic depression or spike frequency adaptation,  
104 the silencing of a spatial bump was a consequence of the network's dynamical activity state

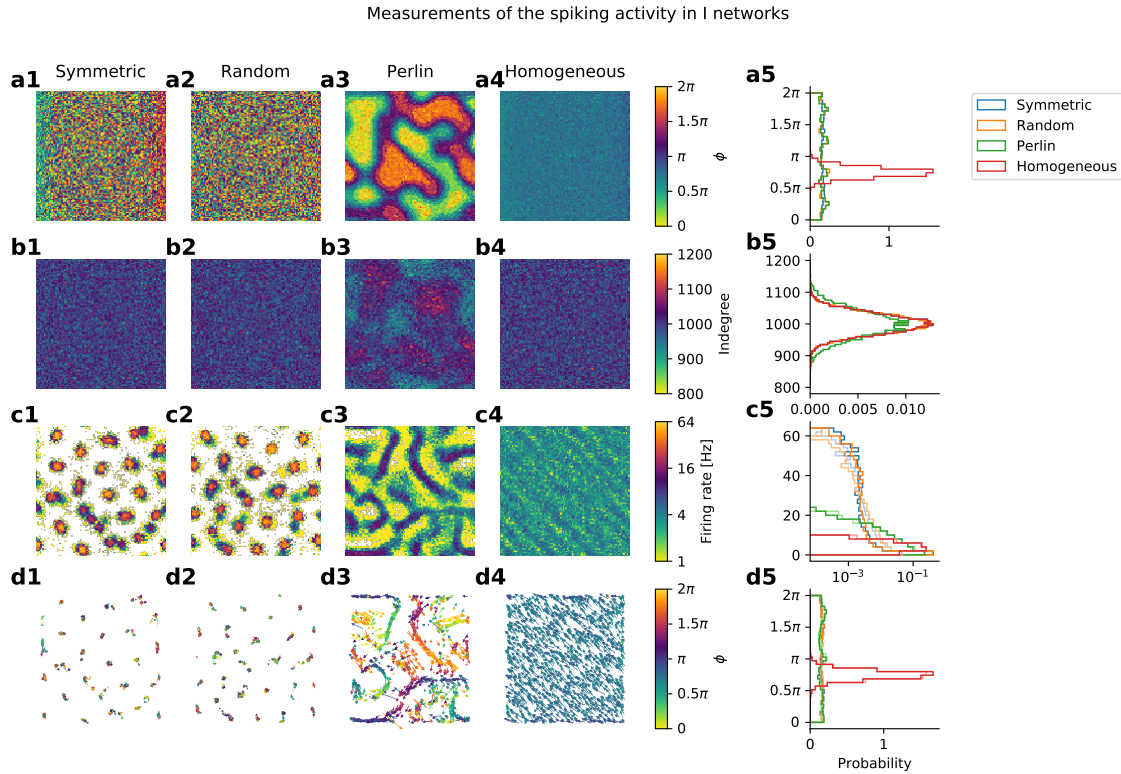

Figure 2: **Network structure and spiking activity in I-networks.** (a) Spatial distribution of connection asymmetries. The square represents the 2-D space of the network. The four panels (a1-a4) show the four different configurations of asymmetric connectivity: symmetric, random, Perlin and homogeneous. The panel a5 shows the distribution of  $\phi$ , measured for each neuron from the locations of its post-synaptic neurons. (b) Spatial distribution of in-degrees of individual neurons in the four configurations (b1-b4). The in-degree distribution was similar for all four configurations (b5). Note that in the Perlin configuration, neurons with high and low in-degree were spatially clustered (b3). (c) Spatial distribution of average firing rates of individual neurons in the four network configurations (c1-c4). (c5) The distribution of firing rate of all the neurons. (d1-d4) Spatially distributed direction of neuronal activity flow in the four configurations. (d5) Distribution of the direction of neuronal activity flow independent of space. In symmetric, random and Perlin configurations, activity could move in all possible directions (blue, orange, green), whereas in the homogeneous configuration, activity flowed in a single direction (red). Note that in symmetric and random configurations, despite the presence of all possible directions of projection, the network activity remained locked at certain specific locations (d1,d2), unlike in the Perlin configuration, in which a clear and spatially diverse flow of activity emerged (d3).

105 and of the spatial  $\phi$ -distribution. Time-averaged firing rates (estimated at over 10 sec) showed  
 106 that neurons participating in the activity sequences were arranged in stripe like patterns in  
 107 the network space (Figure 2c), along which the activity sequences flowed.  
 108 We used the DBSCAN algorithm (see Methods) to track spatial bumps of spiking activity  
 109 over time to identify the activity sequences (Figure 3a). In the random configuration for  
 110 instance we found approximately 23 spatial activity bumps within a time window of 1000 ms  
 111 (Supplementary Figure S3). The identified activity sequences followed specific paths in the

112 network, visible as stripes in the spatial distribution of average firing rates of individual neurons.  
113 Each sequence moved in its own direction, the collection of them forming a uniform distribution  
114 of activity sequence movement directions (Figure 2d5).  
115 In the homogeneous configuration, an extreme case of the connectivity asymmetry, the network  
116 activity exhibited multiple moving bumps. Neurons participating in moving activity bumps  
117 were arranged in a periodic pattern (Figure 2c4) and the activity sequences flowed along  
118 the associated stripes (Figure 2d4). Such patterns of average activity closely resemble with  
119 the 'static' patterns observed in bio-chemical systems (Koch and Meinhardt 1994). Unlike  
120 in the Perlin configuration, in the homogeneous configuration all spatial bumps moved in  
121 the same direction (Figure 2d5, red trace). Because knowing the movement direction of  
122 a single activity sequence was sufficient for knowing the movement directions of all other  
123 sequences, the homogeneous configuration effectively exhibited only a single spatio-temporal  
124 activity sequence. This type of activity pattern was similar to the traveling waves observed in  
125 neural field models with asymmetric connectivity (Roxin et al. 2005; Hutt 2008).  
126 When  $\phi$  was distributed randomly (random configuration) or when neurons made connections  
127 without any directional bias (symmetric configuration), we did not observe any STAS. In  
128 both configurations, the network activity was confined to specific neurons, while others were  
129 inhibited, giving rise to a long-tailed distribution of average firing rates (Figure 2c5). In both  
130 symmetric and random configurations, active neurons were organized in a near hexagonal  
131 pattern of spatial activity bumps (Figure 2c1,c2). Such an activity pattern is a consequence  
132 of the non-monotonic shape of the effective connectivity (Spreizer et al. 2017). In the random  
133 configuration, the spatial organization of the activity bumps was a bit more noisy than in  
134 the symmetric configuration. In both configurations, the spatial bumps jittered randomly  
135 around a fixed location, resulting in a uniform distribution of bump movement directions  
136 (Figure 2d1,d2,d5). Thus, both random and symmetric configurations result in similar types  
137 of network activity states.  
138 Similar to the I-network models, an LCRN with both excitatory and inhibitory neurons (EI-  
139 networks) also exhibited STAS when excitatory neurons made connections to excitatory neu-  
140 rons preferentially in one direction and  $\phi$ -values were distributed according to the Perlin  
141 configuration (Figure 3d). In both EI- and I-network models, the activity sequence could be  
142 extracted from only a few neurons chosen from a small neighborhood (Figure 3b,e) or ran-

143 domly from the whole network (Figure 3c,f). When the spiking activity was sampled from  
144 the entire network and neurons were ordered according to their peak firing rates (as is often  
145 done with experimental data (Harvey et al. 2012; Bakhurin et al. 2017)), the velocity of the  
146 activity sequence appeared to be quite constant (see Figure 3c,f). Experimental data suggest  
147 that the velocity of temporal sequences can vary over time (Bakhurin et al. 2017). In our  
148 network model, we also found that when about 250 active neurons were sampled randomly  
149 from a small network neighborhood, the velocity of the activity sequences varied as a function  
150 of time (Figure 3b). However, this varying velocity could be an artefact of the finite size  
151 effect and of the non-uniform sampling of the sequences (see Figure 3b,c). In general, the  
152 activity sequences in EI-networks model were faster than those in I-networks, because the  
153 activity sequences in EI-networks relied on recurrent excitation, whereas in I-networks they  
154 relied on the lack of the recurrent inhibition (in our I-networks neuronal connectivity varied  
155 non-monotonically with distance, according to a Gamma distribution, therefore there was a  
156 small connection probability among neighboring neurons).

### 157 **Conditions for the emergence of spatio-temporal activity sequences**

158 These results suggested that the emergence of STAS in LCRNs required two conditions to be  
159 met: (1) each neuron projects a fraction of its axons preferentially in a specific direction ( $\phi$ )  
160 and (2) neighboring neurons preferentially project in similar directions. These two conditions  
161 imply a spatially correlated anisotropy in the projection patterns of neurons in the network. In-  
162 deed, upon systematic variation of a wide range of input parameters and excitation-inhibition  
163 balance, we found that, as long as these two conditions were met, irrespective of the compo-  
164 sition of neurons in the LCRN, STAS invariably emerged (Supplementary Figure S4).

### 165 **Co-existence of activity sequences and network oscillations**

166 The rasters of spiking activity in both I-networks and EI-networks indicated the presence of slow  
167 oscillations in Perlin (Figure 3) and homogeneous (not shown) configurations. Therefore, we  
168 measured the spectrum of the summed network activity. The network activity was obtained  
169 by different procedures: by summing the activity of all neurons (Figure 4, blue trace), by  
170 summing the activity of the neurons from a  $10 \times 10$  region in the network (Figure 4, green  
171 trace), and by summing the activity of 100 randomly chosen neurons from the entire network



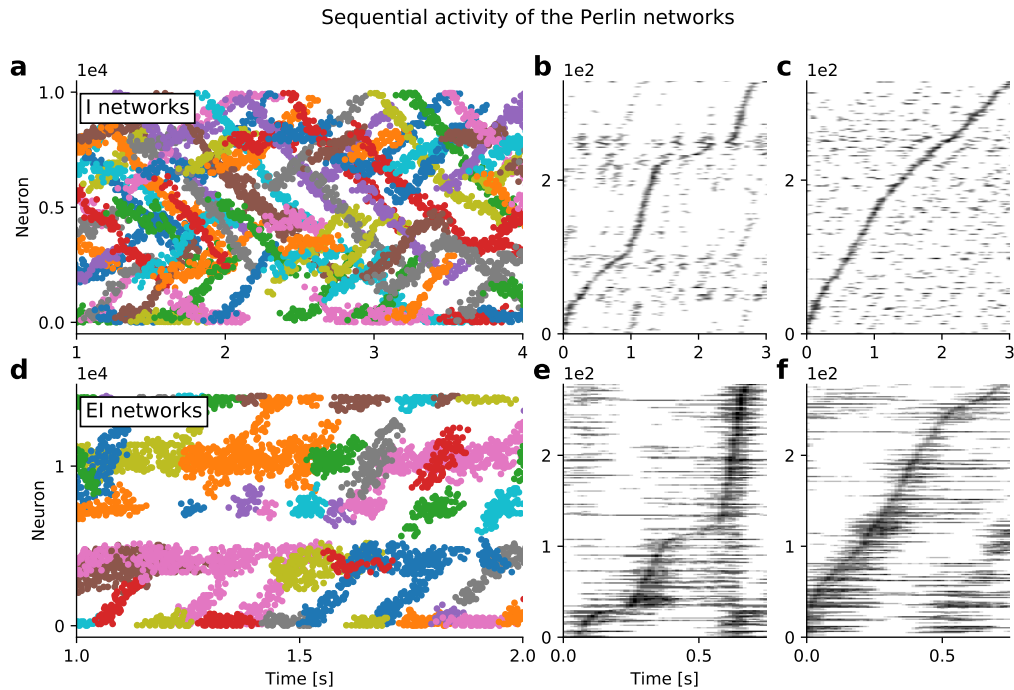

Figure 3: **Spatio-temporal sequences of neuronal activity in networks with Perlin configuration.** (a) Raster plot of spiking activity in an I-network model as a function of time. Each color indicates a cluster of spiking activity in space and time, identified using DBSCAN (see Methods). Note that spikes that were not assigned to any cluster are not shown. (b) Activity of approx. 250 neurons confined in a  $20 \times 20$  region. (c) Activity of approx. 250 neurons randomly selected from the entire network. (b, c) Selected neurons are sorted according to the time of peaked spike counts. (d, e, f) Same as in panels (a, b, c), respectively, but here for an EI-network model. Note the shorter time axes in panels (d, e, f), compared to panels (a, b, c), indicating that sequence movement in EI-networks was clearly faster than in I-networks.

172 (Figure 4, orange trace). For both I-networks (Figure 4) and EI-networks (Supp Figure S5),  
173 neuronal population activity in all four configurations exhibited clear oscillations in the gamma  
174 frequency band (30-60 Hz). These oscillations were a global property of the network, as partial  
175 sampling of the neurons showed only weak signs of oscillatory activity. (Figure 4, orange and  
176 green traces). Moreover, in homogeneous and Perlin configurations, signs of low-frequency  
177 oscillations at around 4-6 Hz were observable. These were presumably a consequence of  
178 the periodic boundary conditions, i.e. the period of slow oscillations was determined by the  
179 sequence propagation velocity (see below) and the spatial network scale. These results suggest  
180 that both STAS and global oscillations can co-exist in the same network model, however, one  
181 did not automatically imply the other.

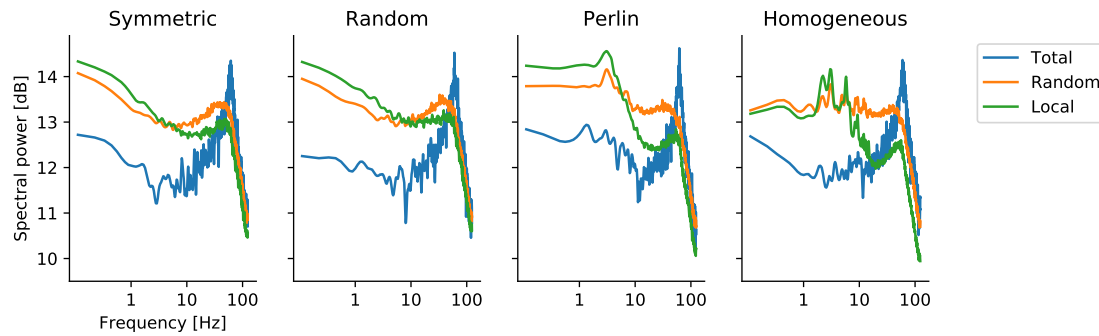

Figure 4: **Power spectra of network activity in different spatial inhomogeneity configurations in I-networks.** Power spectra of summed spiking activities (bin width = 4ms), with different traces referring to the source of the data: the z-score of the spiking activity of the entire network population (blue trace), of 100 randomly selected neurons from the entire network (orange trace), and of the neurons located in a  $10 \times 10$  region in the network (green trace). Different traces referred to the scope of data: the z-score of the spike activity of the whole population of neurons (blue trace), of 100 randomly picked neurons (orange trace) and of the neurons located in a  $10 \times 10$  region in the network (green traces). The spectral power in all network models peaked at approx. 60 Hz (gamma-band oscillations). Additionally, in network models with homogeneous and Perlin configurations, an additional, weak low-frequency peak, at around 4-6 Hz, appeared.

## 182 **Asymmetry in connectivity determines the velocity of spatiotemporal sequences**

183 Next we investigated how the amount of shift in the connectivity affects the STAS. To this  
184 end we shifted the connectivity extent by 1 and 2 grid points. When there was no shift  
185 in the connectivity, network did not exhibit any sequential activity and the activity bumps  
186 jittered around a fixed value with a small velocity (Figure 5a,b blue). However, shifting the  
187 connectivity by 1 grid point was sufficient to induce sequential activity in both homogeneous  
188 and Perlin configurations. The velocity of STAS was higher in homogeneous configuration than  
189 in Perlin configuration (Figure 5a,b orange). When we increased the shift in connectivity by 2  
190 grid points, the mean and the variance of velocity increased in both Perlin and homogeneous  
191 configurations (Figure 5a,b green). These results suggest that the degree of asymmetry in  
192 the connectivity controls the velocity of STAS.

## 193 **Effect of spatial correlation in connection asymmetry on spatio-temporal activity** 194 **sequences**

195 Next, we determined how the spatial correlations in  $\phi$  affect the number and velocity of STAS.  
196 To this end we systematically varied the spatial scale of the Perlin noise (see Methods). This  
197 enabled us to systematically go from a random configuration to a homogeneous configuration

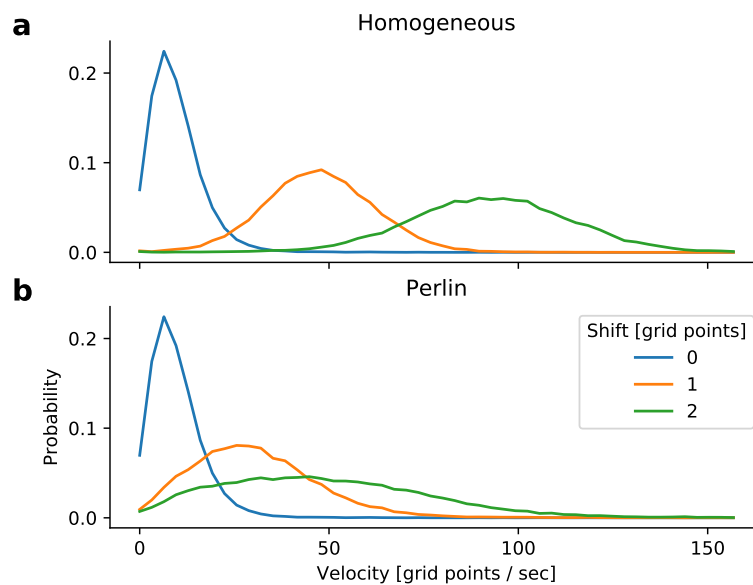

Figure 5: **Velocity of neuronal activity sequences.** Distribution of the velocity of neuronal activity sequences in I-networks with homogeneous (a) and Perlin (b) configurations. The velocity of the activity sequences increased with the increase in connectivity asymmetry. Note that the velocity of activity bump movements in networks with symmetric connections (blue traces) were identical in networks with homogeneous and Perlin configurations. However, for any non-zero degree of asymmetry (orange and green traces) the velocity of activity bump movements was higher in networks with the homogeneous configuration.

198 (Figure 6a top). To count the number of STAS we rendered the activity in a 3-dimensional  
199 space (two space dimensions and one time dimensions) and used DBSCAN algorithm to  
200 calculate clusters (which are the STAS) in this 3-D space. We found that the number of  
201 STAS and their velocity decreased monotonically as we reduced Perlin scale (Figure 6b,c).  
202 This decrease in number and velocity of STAS occurred because reduction in the Perlin scale  
203 reduced the number of neighboring neurons with similar  $\phi$ . This, in turn, reduced the velocity  
204 of the STAS (Figure 6b), because the input in the direction specified by  $\phi$  decreased and the  
205 postsynaptic neurons had to integrate over a longer time to elicit response spikes. Moreover,  
206 because of fewer inputs in the direction  $\phi$  many putative sequences showed weak spiking  
207 activity which could not be classified as a distinct spatio-temporal sequence. Furthermore,  
208 reduction in Perlin scale also increased the variance of movement directions (Figure 6c). These  
209 results show, first, that even a small scale spatial correlation in  $\phi$  suffices to induce STAS  
210 but, second, if the spatial correlation scale is too small, such sequences may not move quickly  
211 enough to be noticed as sequences. For functionally relevant STAS, the spatial correlation in  
212  $\phi$  should be about 20 which is about 1/6th of the network size.

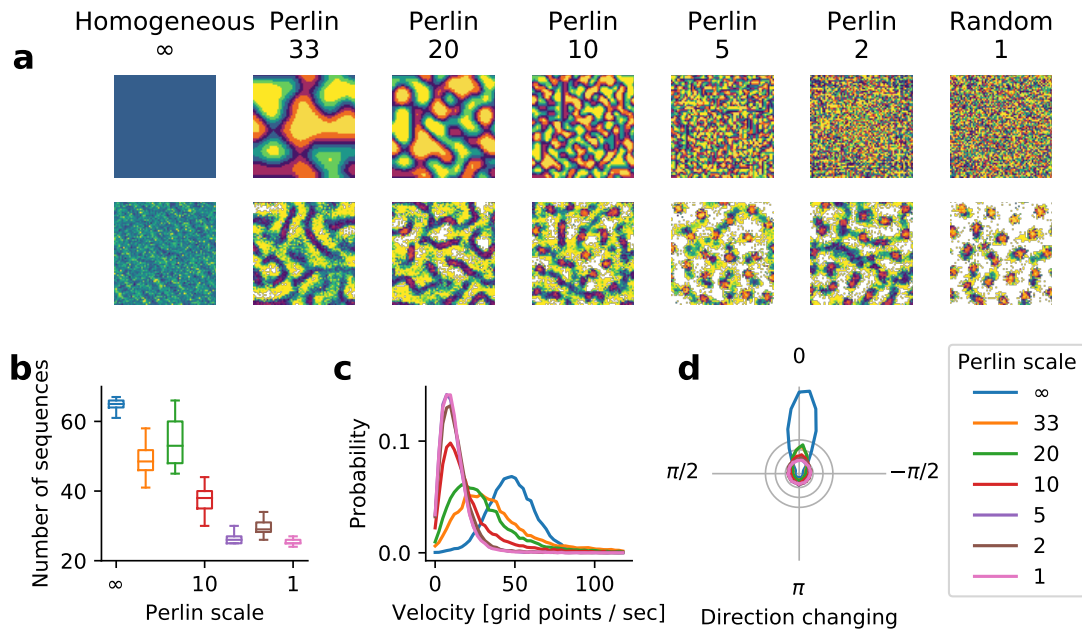

Figure 6: **Effect of spatial scale of correlations in  $\phi$  on the emergence and velocity of STAS in I-networks.** (a) The top row shows the spatial distribution of  $\phi$  for different scales of Perlin noise. The Perlin scales decreased from left to right as reflected in the size of single color blobs. The Perlin scale is indicated in terms of grid points in the network. The bottom row shows the spatial distribution of average firing rates in each of the seven configurations. (b) The number of STAS observed in 1 sec. for different Perlin scales. The box plot shows that statistics of STAS estimated over 90 epoch of 1 sec. each. Different colors indicate the scale of the corresponding Perlin noise. (c) The distribution of the velocity of STAS. Different colors indicate the scale of the corresponding Perlin noise. (d) The distribution of STAS directions in polar plots. In a homogeneous configuration, most sequences moved in a single direction (blue curve). As the Perlin scale decreased, the distribution of movement direction became more widely distributed, indicating an increase in the number of sequences that moved in different directions.

213 **Why does spatially correlated connection asymmetry give rise to spatio-temporal**  
 214 **activity sequences?**

215 To get more insights into the mechanisms underlying the emergence of the STAS in Perlin and  
 216 homogeneous networks we estimated the eigenvalue spectrum of the network's connectivity  
 217 matrix. For an Erdős-Renyi type random network, eigenvalues of the connectivity matrix are  
 218 distributed in a circle (Rajan and Abbott 2006). In an inhibition dominated network, extra  
 219 inhibition introduces very large negative eigenvalues that contribute to the stability of the  
 220 network activity dynamics (Pernice et al. 2011). Here, we found that for an LCRN without  
 221 any directional connectivity (symmetric configuration), most of the eigenvalues were confined

222 within a circle, but the local nature of the connectivity introduced several eigenvalues outside  
223 the circle, with large real parts and small imaginary parts. As we introduced the spatial  
224 asymmetry into the connectivity, the imaginary component of large eigenvalues (those outside  
225 the circle) increased (Figure 7a). The emergence of large complex eigenvalues outside the  
226 main circle is indicative of meta-stable dynamics (Rajan and Abbott 2006). Moreover, the  
227 number of large eigenvalues outside the main lobe (circle in this case) of the eigenvalue  
228 spectrum is equal to the number of 'communities' of neurons in a network (Zhang et al.  
229 2014). This suggests that in both Perlin and homogeneous configurations correlations in the  
230 spatial distribution of  $\phi$ s created many communities (neuronal assemblies), the dynamics of  
231 which are meta-stable.

232 Given the large size of our network models, it is computationally highly demanding to test this  
233 hypothesis by measuring all eigenvalues of an LCRN, identifying and counting the neuronal  
234 assemblies and determining the effective feedforward networks associated with their STAS.  
235 To simplify the problem, we estimated the probability of finding such a feedforward network  
236  $p_{FF}$  in our I- and EI-network models. To this end, we used an iterative procedure to find  
237 feedforward networks in our network models, the details of which are described in the Methods  
238 section. Briefly, we started with a set of 64 neurons ( $F_i$ ) located in a small,  $8 \times 8$  region in  
239 the network. Then we identified a set of all post-synaptic neurons ( $P_i$ ) receiving input from  
240 any of the neurons in the first set  $F_i$ . From the set  $P_i$  we selected the 64 neurons ( $F_{i+1}$ ) that  
241 were most frequently connected to the neurons in the input  $F_i$  (see Methods for details). We  
242 repeated this procedure 50 times, starting at 100 randomly selected different locations of the  
243 initial  $8 \times 8$  regions (see Methods, Figure 7b,c). Thus, we identified feedforward networks  
244 with excitatory connections from  $F_n$  to  $F_{n+1}$  in EI-networks and feedforward networks with  
245 inhibitory connections from  $F_n$  to  $F_{n+1}$  in I-networks.

246 In the homogeneous configuration we always found a feedforward path capable to creating a  
247 STAS (Effective length  $> 16$ ; see Methods and Figure 7c-d). Indeed, in the homogeneous  
248 configuration, the probability to find a feedforward path:  $p_{FF}$  was 1.0 (for both EI- and  
249 I-networks). Moreover, these feedforward paths were very long (Figure 7b, red dots and  
250 crosses). In the Perlin configuration, there were fewer ( $p_{FF} \approx 0.8$  EI-networks;  $p_{FF} \approx 0.66$   
251 I-networks) and shorter (Figure 7b, green dots and crosses) feedforward paths, but they pointed  
252 in different directions (Figure 7b-d). By contrast, in both symmetric and random configura-

253 tions, no feedforward pathways were observed ( $p_{FF} = 0$  for both EI- and I-networks). In  
254 these latter two configurations, neurons participating in  $F_1$  to  $F_{50}$  were confined to a small  
255 space (indicated by the overlap of the color blobs in Figure 7c,d). Ultimately, it was the  
256 existence (or non-existence) of these feedforward pathways that determined the properties of  
257 the STAS in the four different configurations.

258 In EI-networks, within the feedforward path excitatory neurons from  $F_n$  projected to excitatory  
259 neurons within  $F_{n+1}$  with a higher probability than outside  $F_{n+1}$ , thereby creating a path of  
260 high excitation between adjacent groups. When an external input was strong enough STAS  
261 was observed along such paths of high excitation. By contrast, in I-networks within the  
262 feedforward path, inhibitory neurons from  $F_n$  projected to inhibitory neurons within  $F_{n+1}$  with  
263 a higher probability than outside  $F_{n+1}$ , thereby, creating a path of high inhibition from  $F_1$  to  
264  $F_{50}$ . Because the out-degree of neurons was fixed, the concentration of inhibitory connections  
265 within the path from  $F_1$  to  $F_{50}$  created a region of low recurrent inhibition in the vicinity of  
266 the path, along which inhibitory STAS emerged. Thus, the abundance of feedforward paths  
267 in networks with Perlin and homogeneous configurations provided a structural substrate for  
268 the emergence of the rich repertoire of STAS.

269 Feedforward networks are simple but powerful computing devices (Abeles 1991; Kumar et al.  
270 2010). Moreover, such feedforward networks are also thought to be the structural substrates  
271 of the *phase sequences* that Hebb proposed to 'neutralize this behavior' (Hebb 1949). There-  
272 fore, there is a general interest in understanding how feedforward networks may emerge in  
273 an otherwise randomly connected networks. To this end, a number of computational studies  
274 have investigated whether Hebbian synaptic plasticity can generate such feedforward networks.  
275 These attempts are usually successful in creating feedforward networks in small random re-  
276 current network (Masuda and Kori 2007; Clopath et al. 2010; Liu and Buonomano 2009;  
277 Fiete et al. 2010) but do not scale up for large recurrent networks (Kunkel et al. 2011). Our  
278 observations of feedforward networks in an LCRN with Perlin configuration provides a much  
279 simpler generative mechanism that can create feedforward networks in large random neuronal  
280 networks without considering any synaptic plasticity.

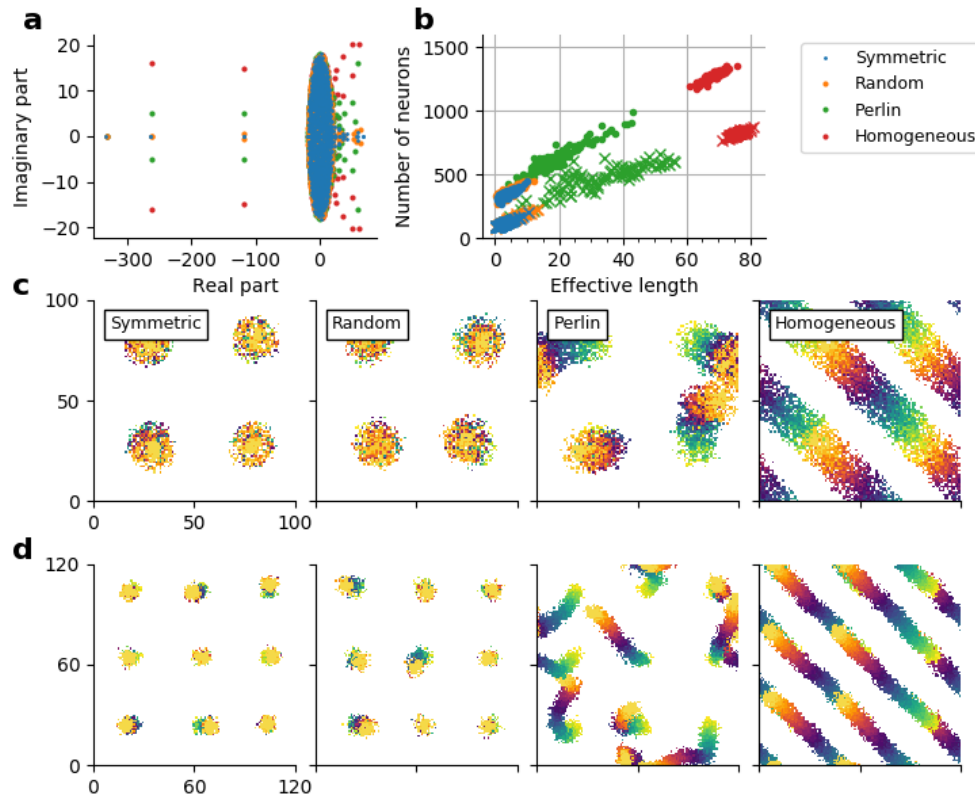

Figure 7: **Spatial clustering of  $\phi$  results in feedforward pathways in otherwise locally connected random networks.** (a) The eigenvalue spectrum of the connectivity matrix of 1000 inhibitory neurons randomly taken from symmetric (blue dots), random (orange dots), Perlin (green dots) and homogeneous (red dots) I-networks. (b) Number of unique target neurons participating in a feedforward path (y-axis) as a function of the effective length of the feedforward path (Euclidean distance between the centroids of  $F_1$  and  $F_{50}$  (see Methods). Feedforward path in I-network (dots), feedforward path in EI-network (crosses). The four colors indicate the network configurations. Note that distinctly more unique neurons with longer path length of the sequential activity movement were observed in Perlin and homogeneous configurations. (c) Effective feedforward pathways in an I-network model with the four configuration (see Methods). Feedforward paths starting from four different locations are shown. The starting neuron set  $F_1$  is shown in yellow, the final set  $F_{50}$  is shown in orange. Effective feedforward pathways were visible as trails changing color from yellow to orange. The starting neuron set  $F_1$  consisted of 64 neurons located in  $8 \times 8$  region of the network. (d) Same as in c, but for an EI-network model with nine different starting set locations

## 281 Discussion

282 Here we have shown that spatial inhomogeneities in network connectivity can lead to the  
 283 emergence of STAS in the network. Unlike existing models of sequence generation, which  
 284 require either manual wiring of neurons or supervised learning, we provide a simple generative  
 285 rule that renders an LCRN with the ability to generate STAS. We showed that when (1)  
 286 individual neurons project a small fraction (approximate 2-5%) of their axons in a preferred  
 287 direction,  $\phi$  (i.e. the connectivity is asymmetric), and (2)  $\phi$ s of neighboring neurons are

288 similar, whereas  $\phi$  of neurons further apart were unrelated (i.e. the network is anisotropic),  
289 the network will generate STAS. That is, asymmetric but spatially correlated connectivity  
290 of neurons translates into sequential spiking activity. Note that, the spatial asymmetry of  
291 neuronal connectivity can also be achieved when a neuron makes stronger instead of more  
292 synapses in the preferred direction ( $\phi$ ). Under this mechanism, the number of STAS and  
293 their propagation velocity are determined by the extent of the connectivity asymmetry and  
294 the spatial scale of the  $\phi$ -correlations (Figure 6).

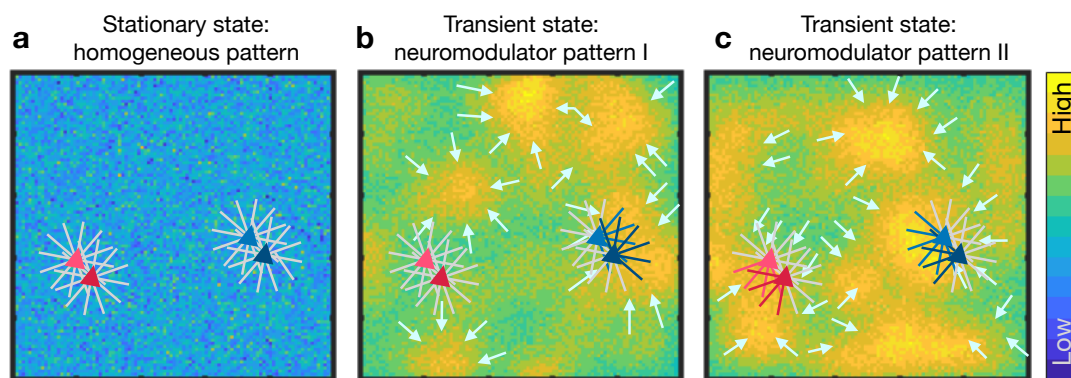

Figure 8: **Dynamic reorganization of activity sequences in a recurrent network.** (a) Schematic of a network in which neurons connect in all direction equally. The blue background shows the baseline level of a certain neuromodulator substance. Two pairs of neurons (blue and red triangles) are shown, the axons of which project in all directions uniformly. This is equivalent to the symmetric configuration and, hence, no sequential activity will emerge. (b) Non-uniform distribution of concentration of the neuromodulator in different parts of the network, as indicated by the colormap. The colored lines indicate the enhanced synaptic strength in specific directions. Asymmetric connectivity of neighboring neurons caused by such non-uniform neuromodulator concentration distribution may result in activity sequence in some regions of the network (e.g. neurons marked in blue). The short arrows mark the potential flow of a neuronal activity sequence along the spatial gradient of the neuromodulator concentration. (c) Same as in (b) for a different pattern of neuromodulator concentration which may lead to a different flow of neuronal activity, resulting in the appearance of activity sequences in a new set of neurons (e.g. those marked in red) and a change in direction of the sequence in others (e.g. those marked in blue).

295 Our proposed sequence generation mechanism demands another mechanism which enables a  
296 group of neurons to make more or stronger synapses in a common direction  $\phi$  in the first  
297 place. Axonal and dendritic arbors of neurons are almost never symmetric in space (Mohan  
298 et al. 2015) and dendritic arbors of some prominent neuron types are highly similar. However,  
299 it is not possible to infer from the available data whether neighboring neurons have similar  
300 orientation of axons. Experimental data suggest that neurons born together tend to share  
301 their inputs (Li et al. 2012). In addition, activity dependent plasticity may also lead to the  
302 formation of a few stronger synapses, possibly (but not necessarily) associated with a preferred



303 projection direction. However, such mechanisms, even if viable, will only hardwire one specific  
304 set of STAS. In the following, we propose a more general and, more importantly, dynamic  
305 mechanism that may lead to asymmetric and spatially correlated connectivity of neurons that  
306 not only generates STAS, but may rapidly switch from one set of sequences to another.

307 Consider a network in which neurons have symmetric dendritic and axonal arbors (Figure 8a).  
308 Such a network would not support activity sequences (Figure 2) and stimulus evoked activity  
309 will be confined to the stimulated region of the network. In this network, the release of a  
310 neuromodulator (e.g. dopamine or acetylcholine) will create a phasic increase in the neu-  
311 romodulator levels in small patches (Figure 8b, yellow blobs). Such patches naturally arise  
312 because of the non-uniform distribution of axons releasing the neuromodulator and the diffu-  
313 sion in the neural tissue which presents an inhomogeneous medium. A similar patchy spatial  
314 profile of dopamine has been recently observed experimentally *in vivo* (Patriarchi et al. 2018).  
315 Most synapses within the regions of high neuromodulator concentration will be potentiated  
316 (schematically shown in Figure 8b, blue neurons) and, hence, create an asymmetric, spatially  
317 correlated connectivity for as long as the neuromodulator concentration remains high. That is,  
318 along the spatial gradient of the neuromodulator concentration (Figure 8b, arrows), effective  
319 connectivity may be modified to generate STAS.

320 This neuromodulator based mechanism to generate spatially correlated asymmetric, anisotropic  
321 connectivity automatically provides a mechanism to rapidly switch between sequences. A  
322 change in the spatial profile of the neuromodulator concentration will potentiate another  
323 set of synapses, possibly leading to the recruitment of new neurons in the activity sequence  
324 (Figure 8b,c red neurons), or to the assignment of neurons to a different sequence (Figure  
325 8b,c, blue neurons). In the discussion above, we assumed that the neuromodulator enhances  
326 synaptic strengths, but the same argument holds also when the neuromodulator suppresses  
327 synaptic strengths. Thus, neuromodulators may play a crucial role, not only in the formation  
328 of STAS, but also in rapidly switching between different sets of sequences. Moreover, by  
329 their spatial concentration distribution, neuromodulators can also control the speed of the  
330 activity sequence. This idea is consistent with experimental observations, e.g. the finding  
331 that acetylcholine is important for retinal waves (Ackman et al. 2012).

332 The key prediction of our network model is that in brain regions generating STAS, neurons  
333 should have asymmetric but spatially correlated network connectivity. Such correlated asym-

metry can be observed in at least two different forms: (1) asymmetric but similar axonal or dendritic arbors of neighboring neurons, and (2) neighboring neurons receiving strong synapses from common sources and sending out strong synapses to common targets. Secondly, we predict that neuromodulators play a crucial role in the generation and control of STAS in an otherwise isotropic networks. This can be tested by experimentally controlling the spatial profile of the corresponding neuromodulator release pattern by optogenetic stimulation of its source neurons.

In summary, we propose a simple generative rule that enables neuronal networks to generate STAS. How these spontaneously generated sequences interact with stimuli and how we can create stimulus - sequence associations is an interesting and involved question that will be addressed in future work. Similarly, more work is needed to determine the role of neuronal and synaptic weight heterogeneities in shaping spontaneous and stimulus-evoked neuronal activity sequences, either with or without changes in neuromodulator concentration distributions.

## Methods

### Neuron model

Neurons in the recurrent networks were modelled as ‘leaky-integrate-and-fire’ (LIF) neurons. The sub-threshold membrane potential ( $v$ ) dynamics of LIF neurons are given by:

$$C_m \frac{dv_i}{dt} = -g_L(v_i(t) - E_L) + I_i(t) + \mu_{GWN_i} + \sigma_{GWN_i} \quad (1)$$

where  $\tau_m = \frac{C_m}{g_L}$  denotes the membrane time constant,  $C_m$  the membrane capacitance,  $g_L$  the leak conductance,  $E_L$  the leak reversal potential, and  $I(t)$  the total synaptic current. The neuron parameters are listed in Table 1, top.

Synapses in the network were modeled as current transients. The temporal profile of the current transient in response to a single pre-synaptic spike was modeled as an  $\alpha$  function. We adjusted the synaptic currents to obtain weak synapses such that both a unitary inhibitory post-synaptic potential (IPSP) and a unitary excitatory postsynaptic potential (EPSP) had an amplitude of 0.22 mV. The synapse parameters (synaptic strength, time constant and delay) were fixed throughout the simulations and are listed in Table 1, bottom.

## 360 **Network architecture**

361 We studied two types of recurrent network models in which the connection probability between  
362 any two neurons depended on the physical distance between them. Neurons in both network  
363 models were placed on a regular square grid. To avoid boundary effect, the grid was folded to  
364 form a torus (Kumar et al. 2008). In both network types, multiple connections were permitted  
365 (Supplementary Figure S1), but self-connections were excluded.

366 *Networks with only inhibitory neurons:* The first type network model (I-network) was com-  
367 posed of only inhibitory neurons. These neurons were arranged on a  $100 \times 100$  grid ( $n_{pop} =$   
368  $10,000$ ). Each neuron projected to 1,000 other neurons (corresponding to an average connec-  
369 tion probability in the network of 10%). The distance-dependent connection probability varied  
370 according to a  $\Gamma$  distribution (Spreizer et al. 2017) with the following parameters:  $\kappa = 4$  for  
371 the shape and  $\theta = 3$  for the spatial scale. All I-network parameters are summarized in Table  
372 2.

373 *Networks with both excitatory and inhibitory neurons:* The second type network model (EI-  
374 network) was composed of both excitatory and inhibitory neurons. Excitatory and inhibitory  
375 neurons were arranged on a  $120 \times 120$  ( $n_{pop_E} = 14,400$ ) and on a  $60 \times 60$  grid ( $n_{pop_I} =$   
376  $3,600$ ), respectively. Each neuron of the excitatory and inhibitory populations projected to 720  
377 excitatory and 180 inhibitory neurons (average connection probability 5%). The connection  
378 probability varied with distance between neurons according to a Gaussian distribution (Kumar  
379 et al. 2008; Schnepel et al. 2015; Spreizer et al. 2017). The space constant (standard deviation  
380 of the Gaussian distribution) for excitatory targets was  $\sigma_E = 12$  and for inhibitory targets  $\sigma_I =$   
381  $9$ . We considered a high probability of connections within a small neighborhood, therefore,  
382 these networks were referred to as locally connected random networks (LCRN (Mehring et al.  
383 2003)). All EI-network parameters are summarized in Table 3. Whenever possible, we used  
384 parameters corresponding to a standard EI-network (Brunel 2000).

## 385 **Asymmetry in spatial connections**

386 Typically, in network models with distance-dependent connectivity, the connection probability  
387 is considered to be isotropic in all directions. In the network model studied here, however,  
388 we deviated from this assumption and introduced spatial inhomogeneities in the recurrent  
389 connections. Specifically, we considered a scenario in which the neuronal connectivity was

390 asymmetric in the sense that each neuron projected a small fraction of its axons in a particular  
391 direction  $\phi$  (Figure 1a,b). At the same time we ensured that the out-degree of each neuron  
392 was the same as in an LCRN with isotropic connectivity. The fraction of extra connections  
393 in the direction  $\phi$  depended on the shift in the region of post-synaptic neurons (green circle  
394 in Figure 1a). To quantify the change in connection probability, we estimated the average  
395 distance-dependent connectivity in the symmetric configuration ( $S$ ) and in the homogeneous  
396 configuration ( $H$ ). The change in connectivity was then measured as  $(S - H)/S$ .  
397 Shifting the connectivity region of a neuron by one grid location in our network model means  
398 that the probability of a neuron to make a connection in that direction was increased or de-  
399 creased by some amount  $\Delta p = 0 - 100\%$ , depending on the distance between the neurons.  
400 At short distances, the connection probability almost doubled, whereas at distances between  
401 10-20 grid points, there was only a very small change in the connection probability (Sup-  
402plementary Figure S2). At larger distances ( $> 20$  grid points), the connection probability  
403 changed by a large amount (Supplementary Figure S2). This is because at such distances the  
404 connectivity is sparse (connection probability  $< 0.01$ ) and the measure  $(S - H)/S$  amplifies  
405 small changes for small  $S$ . Because we maintained the out-degree of the neurons, an increase  
406 in the connection probability in one direction implied a reduction in connection probability by  
407 the same amount in the opposite direction.  
408 Note that an increased connection probability also increased the probability to form multiple  
409 connections in the close neighborhood of the projecting neuron (Supplementary Figure S1).  
410 The preferred direction ( $\phi$ ) for each neuron was chosen at random from a set of eight different  
411 directions, considering that neurons were positioned in a grid pattern. All other synaptic  
412 parameters, such as the number of total connections, the space constant of the connectivity  
413 kernel and the synaptic weights were identical for all neurons.

#### 414 **Spatial distribution of asymmetry in spatial connections**

415 In a network model with asymmetric recurrent connections it does not suffice to select the  
416 preferred connectivity direction of target neurons for individual source neurons depending on  
417 their positions. We also need to define how exactly the 'directions' ( $\phi$ ) are distributed in  
418 space. For this, we considered four qualitatively different configurations  
419 *Homogeneous configuration*: In this configuration all neurons had the same  $\phi$ , indicating a

420 single-direction bias of the projections of all neurons (Figure 1c, left).

421 *Random configuration:* In this configuration  $\phi$  for each neuron was chosen independently at  
422 random from a uniform distribution (Figure 1c, middle).

423 *Perlin configuration:* In this configuration  $\phi$  was also chosen from a uniform distribution as in  
424 the random configuration, but it was assigned to each neuron according to the Perlin noise - a  
425 class of gradient noise (Perlin 1985). The generation of Perlin noise is described below. This  
426 spatial distribution of  $\phi$  ensured that neighboring neurons had similar preferred directions  
427 (Figure 1c, right). *Symmetric configuration:* In this configuration all neurons established  
428 connections in an isotropic manner, without any directional preference.

### 429 **Perlin noise**

430 To generate Perlin noise we first created a  $p \times p$  grid (Perlin grid) that covered the whole  
431 network (of size  $N \times N$ ;  $N = 100$  I-networks and  $N = 120$  for EI-networks). We defined  
432  $p = \frac{N}{\text{Perlin scale}}$ . For example a *Perlin scale* = 20 meant that Perlin grid was of size  $5 \times 5$  for  
433 the I-networks and  $6 \times 6$  for the EI-networks. The variable *Perlin scale* controlled the spatial  
434 correlations. After defining the Perlin grid, each grid point was assigned a value chosen from  
435 a uniform distribution  $\mathbb{U}[0, 2\pi]$ . Next, we interpolated the Perlin grid to a size of the  $N \times N$   
436 (same size as the I-network or EI-network). The resulting values were used as the  $\phi$  of the  
437 neuron located at that grid point. For more details about generation of Perlin noise please  
438 see (Perlin 1985).

### 439 **Input and network dynamics**

440 All neurons received independent, homogeneous excitatory inputs from an external drive.  
441 We selected Gaussian white noise as an adequate input for generating ongoing spiking activity  
442 dynamics, which could be set to different activity levels by varying the input mean and variance  
443 independently.

### 444 **Identification of spatio-temporally clustered activity**

445 To identify the STAS we rendered the spiking activity in a three dimensional space spanned  
446 by two spatial dimensions of the network and one time dimension. Each spike is a point  
447 and an STAS is a cluster in this 3-D space. We used the density-based spatial clustering

448 algorithm of applications with noise (DBSCAN) (Ester et al. 1996) to determine individual  
449 clusters of the spiking activity in space and time. The DBSCAN algorithm required two  
450 parameters for the analysis: the maximum distance between two points in a cluster (*eps*) and  
451 the minimum number of points required to form a cluster (*minPts*). This algorithm needed  
452 a supervised control and an adequate value for *eps*, depending on the average spatial and  
453 -temporal distance (i.e. firing rate) between spikes of the neurons. For instance, when the  
454 average firing rate of the neurons was too high, then multiple STAS could be coalesced into a  
455 single STAS. On the other hand, when average firing rate of the neurons were small a single  
456 STAS could be dissociated into multiple small STAS. To avoid such problems, we reduced  
457 the temporal scale of spikes by a factor 20 and 3 for I-networks and EI-networks, respectively.  
458 Note that, this temporal rescaling was not used for the estimation of other properties of the  
459 network activity dynamics. The *eps* value was set to 3 and 2 for I-networks and EI-networks,  
460 respectively. Using the DBSCAN we identified STAS in successive, overlapping time windows  
461 of duration 1 sec (overlap duration 0.9 sec).

## 462 **Spatial arrangement of locally clustered activity**

463 For each identified cluster we calculated the spatial centroids of activity bumps observed in suc-  
464 cessive time windows of 1 sec. The vectors composed of these successive centroids described  
465 the successive spatial coordinates of the bump activity and, hence, reveal the movement of  
466 the bump activity. Using these vectors we plotted the pathways of the moving activity bumps  
467 in the networks spatial map.

## 468 **Quantification of activity bump movement**

469 Keeping track of direction changes in bump movement is an adequate measurement for the  
470 dynamics of sequential and non-sequential activities. In travelling waves, activity bumps  
471 typically move in a single direction, whereas in spatially fixed patterns, activity bumps alternate  
472 directions erratically over very short time scales. Between these two extrema, activity bump  
473 movements changed their direction slowly. The direction changing of bump movement is  
474 given by:

$$d\alpha = \alpha_t - \alpha_{t-1} \quad (2)$$

475 where  $\alpha_t$  denotes the direction of bump movement observed at time step  $t$ , and  $d\alpha$  ranges  
476 from  $-\pi$  (opposite direction) over 0 (no alternation) to  $\pi$  (opposite direction).

#### 477 **Identification of feedforward networks in the LCRN**

478 To identify a feedforward network  $FF$  in the LCRN we started with a set of 64 neurons ( $F_i$ ),  
479 located in a  $8 \times 8$  region in the network. This choice was motivated by seeing that individual  
480 spatial clusters of active neurons were of size  $8 \times 8$ . We then identified all post-synaptic  
481 neurons ( $P_i$ ) connected to any of the neurons in the set  $F_i$ . From the set  $P_i$  we selected 64  
482 neurons ( $F_{i+1}$ ) that received the most number of connections from the  $F_i$ . We repeated this  
483 procedure 50 times, starting at 100 different, randomly selected locations. Given the delays  
484 in the network, 50 time steps would imply that a sequence lasted for at least 100 ms. In this  
485 manner we identified feedforward networks with excitatory (inhibitory) connections from  $F_n$   
486 to  $F_{n+1}$  in EI-networks (I-networks).

487 To quantify the feedforward path we measured the number of neurons ( $nFF$ ) belonging to  
488  $F_1 \dots F_{50}$  over the trajectory between the centroids of  $F_1$  and  $F_{50}$  (Figure 7b,c). Note that  
489 each neuron was counted only once. The larger  $nFF$ , the longer and/or broader is the  
490 feedforward network.

491 In addition, we measured the *Effective length* as the Euclidean distance between the centroids  
492 of  $F_1$  and  $F_{50}$ . Based on visual inspection of the locations of  $F_1 \dots F_{50}$ , we are implicitly  
493 assumed that  $\{F_n; n > 2\}$  does not loop back to the same region where  $F_1$  is located.

494 To call the set of neurons that constitute  $F_1 \dots F_{50}$  a feedforward path capable of creating  
495 STAS, we argued that  $\{F_n; n > 2\}$  must be outside the connection region of the neurons  
496 in  $F_1$ . In EI-networks the space constant of excitatory projections of a neurons is  $\sigma_E = 12$ .  
497 If we assume that  $\approx 70\%$  connections are within one  $\sigma_E$  (because the shape of connection  
498 probability function is Gaussian) then, in EI-networks the combined connection region of all  
499 neurons in  $F_1$  has a diameter of  $12 + 8 + 12 = 32$ . Therefore, to be outside the connection  
500 region of  $F_1$ , the centroid of  $F_{50}$  should be at least 16 grid points away from the centroid of  
501  $F_1$  in EI-networks or the *Effective length* should be greater than 16. Similarly, we estimated  
502 the *Effective length* for I-networks as 16.

503 Thus, we defined that an effective feedforward pathway capable to creating STAS should have  
504 an *Effective length*  $> 16$  (for EI- and I-networks). Finally, we defined  $pFF$  as the frequency

505 of finding a feedforward path of *Effective length*  $> 16$ .

## 506 **Simulation Tools**

507 All simulations of the network models were performed using the NEST simulation software  
508 (<http://www.nest-initiative.org>) (Peyser et al. 2017). The dynamical equations were inte-  
509 grated at a fixed temporal resolution of 0.1 ms. Simulation data were analyzed with Python us-  
510 ing the scientific libraries SciPy (<http://www.scipy.org>) and NumPy (<http://www.numpy.org>),  
511 and visualized using the plotting library Matplotlib (<http://matplotlib.org>). The code will be  
512 made available at GitHub.

## 513 **Acknowledgements**

514 We would like to thanks Dr. Upinder Singh Bhalla and Dr. Ulrich Egert for helpful discussions  
515 during the preparation of the manuscript. Partial funding of this work by the German-Israeli  
516 Foundation for Scientific Research and Development (GIF), the German Federal Ministry of  
517 Education and Research (BMBF) grant 01GQ0830 to the Bernstein Focus Neurotechnology  
518 (BFNT) Freiburg/Tuebingen, the Carl Zeiss Foundation, Parkinsonfonden Sweden, Swedish  
519 Research Council (StratNeuro and India-Sweden collaboration grant) is gratefully acknowl-  
520 edged.

## **References**

- Abeles M (1991) *Corticonics: Neural Circuits of the Cerebral Cortex* Cambridge University Press.
- Ackman JB, Burbridge TJ, Crair MC (2012) Retinal waves coordinate patterned activity throughout the developing visual system. *Nature* 490:219–225.
- Bakhurin KI, Goudar V, Shobe JL, Claar LD, Buonomano DV, Masmanidis SC (2017) Differential encoding of time by prefrontal and striatal network dynamics. *Journal of Neuroscience* 37:854–870.
- Bhalla US (2017) Dendrites, deep learning, and sequences in the hippocampus. *Hippocampus* pp. 1–13.



- Brunel N (2000) Dynamics of sparsely connected networks of excitatory and inhibitory spiking neurons. *Journal of Computational Neuroscience* 8:183–208.
- Clopath C, Büsing L, Vasilaki E, Gerstner W (2010) Connectivity reflects coding: a model of voltage-based stdp with homeostasis. *Nature neuroscience* 13:344–352.
- Diesmann M, Gewaltig MO, Aertsen A (1999) Stable propagation of synchronous spiking in cortical neural networks. *Nature* 402:529–533.
- Dragoi G, Tonegawa S (2011) Preplay of future place cell sequences by hippocampal cellular assemblies. *Nature* 469:397–401.
- Ester M, Kriegel HP, Sander J, Xu X et al. (1996) A density-based algorithm for discovering clusters in large spatial databases with noise. *Proceedings of the Second International Conference on Knowledge Discovery and Data Mining (KDD-96)* 96:226–231.
- Fiete IR, Senn W, Wang CZ, Hahnloser RH (2010) Spike-time-dependent plasticity and heterosynaptic competition organize networks to produce long scale-free sequences of neural activity. *Neuron* 65:563–576.
- Hahnloser RH, Kozhevnikov AA, Fee MS (2002) An ultra-sparse code underlies the generation of neural sequences in a songbird. *Nature* 419:65–70.
- Harvey CD, Coen P, Tank DW (2012) Choice-specific sequences in parietal cortex during a virtual-navigation decision task. *Nature* 484:62–68.
- Hebb DO (1949) *The organization of behavior: A neuropsychological theory*. John Wiley and Sons.
- Hutt A (2008) Local excitation-lateral inhibition interaction yields oscillatory instabilities in nonlocally interacting systems involving finite propagation delay. *Physics Letters A* 372:541–546.
- Hutt A, Atay FM (2005) Analysis of nonlocal neural fields for both general and gamma-distributed connectivities. *Physica D: Nonlinear Phenomena* 203:30–54.
- Ikegaya Y, Aaron G, Cossart R, Aronov D, Lampl I, Ferster D, Yuste R (2004) Synfire chains and cortical songs: Temporal modules of cortical activity. *Science* 304:559–564.

- Jin DZ, Fujii N, Graybiel AM (2009) Neural representation of time in cortico-basal ganglia circuits. *Proceedings of the National Academy of Sciences* 106:19156–19161.
- Koch A, Meinhardt H (1994) Biological pattern formation: from basic mechanisms to complex structures. *Reviews of Modern Physics* 66:1481–1507.
- Kumar A, Rotter S, Aertsen A (2008) Conditions for propagating synchronous spiking and asynchronous firing rates in a cortical network model. *Journal of Neuroscience* 28:5268–5280.
- Kumar A, Rotter S, Aertsen A (2010) Spiking activity propagation in neuronal networks: Reconciling different perspectives on neural coding. *Nature Reviews Neuroscience* 11:615–627.
- Kunkel S, Diesmann M, Morrison A (2011) Limits to the development of feed-forward structures in large recurrent neuronal networks. *Frontiers in Computational Neuroscience* 4:160.
- Li Y, Lu H, Cheng PI, Ge S, Xu H, Shi SH, Dan Y (2012) Clonally related visual cortical neurons show similar stimulus feature selectivity. *Nature* 486:118.
- Liu JK, Buonomano DV (2009) Embedding multiple trajectories in simulated recurrent neural networks in a self-organizing manner. *Journal of Neuroscience* 29:13172–13181.
- Luczak A, Bartho P, Marguet SL, Buzsaki G, Harris KD (2007) Sequential structure of neocortical spontaneous activity in vivo. *Proceedings of the National Academy of Sciences* 104:347–352.
- Masuda N, Kori H (2007) Formation of feedforward networks and frequency synchrony by spike-timing-dependent plasticity. *Journal of Computational Neuroscience* 22:327–345.
- Mehring C, Hehl U, Kubo M, Diesmann M, Aertsen A (2003) Activity dynamics and propagation of synchronous spiking in locally connected random networks. *Biological Cybernetics* 88:395–408.
- Modi MN, Dhawale AK, Bhalla US (2014) Ca1 cell activity sequences emerge after reorganization of network correlation structure during associative learning. *Elife* 3:e01982.
- Mohan H, Verhoog MB, Doreswamy KK, Eyal G, Aardse R, Lodder BN, Goriounova NA, Asamoah B, Brakspear AC, Groot C et al. (2015) Dendritic and axonal architec-

- ture of individual pyramidal neurons across layers of adult human neocortex. *Cerebral Cortex* 25:4839–4853.
- Murray JM, Escola G (2017) Learning multiple variable-speed sequences in striatum via cortical tutoring. *eLife* 6:1–24.
- Pastalkova E, Itskov V, Amarasingham A, Buzsáki G (2008) Internally generated cell assembly sequences in the rat hippocampus. *Science* 321:1322–1327.
- Patriarchi T, Cho JR, Merten K, Howe MW, Marley A, Xiong WH, Folk RW, Broussard GJ, Liang R, Jang MJ et al. (2018) Ultrafast neuronal imaging of dopamine dynamics with designed genetically encoded sensors. *Science* p. eaat4422.
- Perlin K (1985) An image synthesizer. *ACM SIGGRAPH Computer Graphics* 19:287–296.
- Pernice V, Staude B, Cardanobile S, Rotter S (2011) How structure determines correlations in neuronal networks. *PLoS Computational Biology* 7:e1002059.
- Peyser A, Sinha A, Vennemo SB, Ippen T, Jordan J, Graber S, Morrison A, Trensch G, Fardet T, Mørk H, Hahne J, Schuecker J, Schmidt M, Kunkel S, Dahmen D, Eppler JM, Diaz S, Terhorst D, Deepu R, Weidel P, Kitayama I, Mahmoudian S, Kappel D, Schulze M, Appukuttan S, Schumann T, Tuñç HC, Mitchell J, Hoff M, Müller E, Carvalho MM, Zajzon B, Plesser HE (2017) NEST 2.14.0.
- Rabinovich MI, Varona P, Selverston AI, Abarbanel HD (2006) Dynamical principles in neuroscience. *Reviews of Modern Physics* 78:1213–1265.
- Rajan K, Abbott L (2006) Eigenvalue spectra of random matrices for neural networks. *Physical Review Letters* 97:188104.
- Rajan K, Harvey C, Tank D (2016) Recurrent network models of sequence generation and memory. *Neuron* 90:128–142.
- Rinzel J, Terman D, Wang XJ, Ermentrout B (1998) Propagating activity patterns in large-scale inhibitory neuronal networks. *Science* 279:1351–1355.
- Roxin A, Brunel N, Hansel D (2005) The role of delays in shaping spatio-temporal dynamics of neuronal activity in large networks. *Physical Review Letters* 94:238103.

Schnepel P, Kumar A, Zohar M, Aertsen A, Bousein C (2015) Physiology and impact of horizontal connections in rat neocortex. *Cerebral Cortex* 25:3818–3835.

Spreizer S, Angelhuber M, Bahuguna J, Aertsen A, Kumar A (2017) Activity dynamics and signal representation in a striatal network model with distance-dependent connectivity. *Eneuro* 4:ENEURO.0348–16.2017.

Zhang K (2009) Persistent firing supported by an intrinsic cellular mechanism in a component of the head direction system. *Journal of Neuroscience* 29:4945–4952.

Zhang X, Nadakuditi RR, Newman ME (2014) Spectra of random graphs with community structure and arbitrary degrees. *Physical Review E* 89:042816.

## Tables & Figures

### Neurons & synapses

| Name         | Value    | Description                                     |
|--------------|----------|-------------------------------------------------|
| $C_m$        | 250.0 pF | Membrane capacitance                            |
| $g_L$        | 25.0 nS  | Membrane capacitance                            |
| $\tau_m$     | 10.0 ms  | Membrane time constant                          |
| $E_L$        | -70.0 mV | Leak potential, resting potential               |
| $V_{th}$     | -55.0 mV | Spike threshold                                 |
| $V_{reset}$  | -70.0 mV | Resting membrane potential                      |
| $t_{ref}$    | 2.0 ms   | Refractory period                               |
| $\tau_{exc}$ | 5.0 ms   | Time constant of excitatory synapse             |
| $\tau_{inh}$ | 5.0 ms   | Time constant of inhibitory synapse             |
| $J_{ext}$    | 1.0 pA   | Synaptic weight of the external input           |
| $J_x$        | 10.0 pA  | Base value of the synaptic weight               |
| $EPSP$       | 0.22 mV  | Amplitude of excitatory post synaptic potential |
| $IPSP$       | 0.22 mV  | Amplitude of inhibitory post synaptic potential |
| $d$          | 1.0 ms   | Synaptic delay                                  |

Table 1: Parameter values for the neurons (top) and for the synapses (bottom) in both network models.

### I network model

| Name           | Value                         | Description                                         |
|----------------|-------------------------------|-----------------------------------------------------|
| Neuron model   |                               | Integrate and fire                                  |
| $nrow, ncol$   | 100                           | number of rows/columns in a network layer           |
| $npop$         | $ncol \times nrow = 10,000$   | number of neurons                                   |
| Synapse model  |                               | $\alpha$ function, current-based model              |
| $\kappa$       | 4                             | Shape for gamma distribution function               |
| $\theta$       | 3                             | Scale for gamma distribution function               |
| $p_{conn}$     | 0.1                           | Average connection probability of target neurons    |
| $n_{conn}$     | $p_{conn} \times npop = 1000$ | Number of recurrent connections per neuron          |
| $J_{rec}$      | $-J_x = -0.22$ mV             | Synaptic weight of recurrent inhibitory connections |
| $\mu_{GWN}$    | 700.0 pA                      | Mean of external GWN input                          |
| $\sigma_{GWN}$ | 100.0 pA                      | Standard deviation of external GWN input            |

Table 2: Parameter values for the networks (top), for the connections (middle) and for an external input (bottom) in I network model.

| <b>EI network model</b> |                                 |                                              |
|-------------------------|---------------------------------|----------------------------------------------|
| Name                    | Value                           | Description                                  |
| <b>Neuron model</b>     |                                 |                                              |
|                         |                                 | Integrate and fire                           |
| $nrow_E, ncol_E$        | 120                             | number of rows/columns in exc. network layer |
| $nrow_I, ncol_I$        | 60                              | number of rows/columns in inh. network layer |
| $npop_E$                | $ncol_E \times nrow_E = 14,400$ | number of excitatory neurons                 |
| $npop_I$                | $ncol_I \times nrow_I = 3,600$  | number of inhibitory neurons                 |
| $npopratio$             | $npop_E : npop_I = 4 : 1$       | Ratio of exc. - inh. neurons                 |
| <b>Synapse model</b>    |                                 |                                              |
|                         |                                 | $\alpha$ function, current-based model       |
| $\sigma_E$              | 12                              | Space constant for excitatory targets        |
| $\sigma_I$              | 9                               | Space constant for inhibitory targets        |
| $p_{conn}$              | 0.05                            | Connection probability of target neurons     |
| $n_{connE}$             | $p_{conn} \times npop_E = 720$  | Connection number of excitatory targets      |
| $n_{connI}$             | $p_{conn} \times npop_I = 180$  | Connection number of inhibitory targets      |
| $g$                     | 6                               | Ratio of recurrent inhibition and excitation |
| $J_E$                   | $J_x = 0.22$ mV                 | Synaptic weights of excitatory targets       |
| $J_I$                   | $g \times J_E = -1.32$ mV       | Synaptic weights of inhibitory targets       |
| $\mu_{GWN}$             | 350.0 pA                        | Mean of external GWN input                   |
| $\sigma_{GWN}$          | 50.0 pA                         | Standard deviation of external GWN input     |

Table 3: Parameter values for the networks (top), for the connections (middle) and for an external input (bottom) in EI-network model.

## Supplementary materials

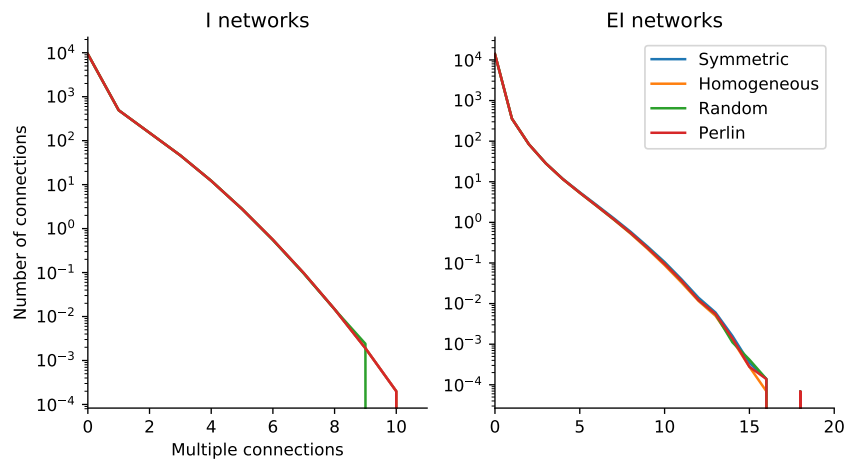

Figure S1: **Multiplicity of connections.** Count distribution of multiple connections between any pair of neurons in an I-network (left) and in an EI-network (right). The multiple connections were formed primarily because of the connectivity rule (local connectivity). Note that the network configuration (as indicated by different colors of the curves) had only a minute influence on the distribution of multiple connections.

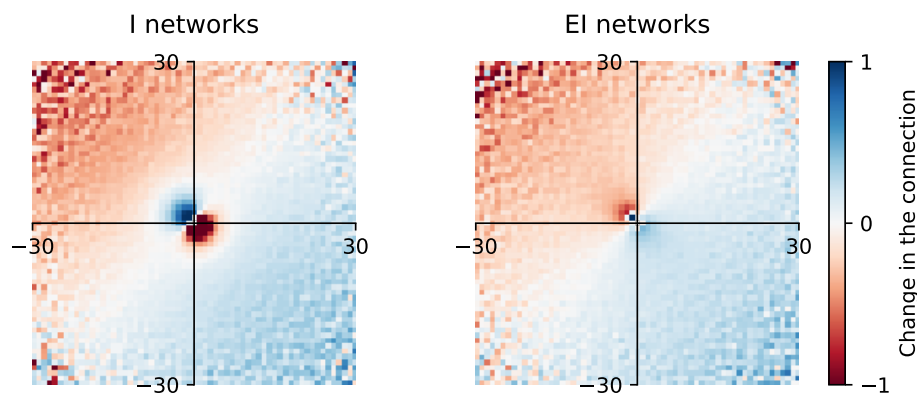

Figure S2: **Effect of forcing a neuron to make some connections preferentially in the direction  $\phi$ .** To determine how the connectivity of a neuron changed when we forced it to make some connections preferentially in the direction  $\phi$  while keeping its out-degree constant, we defined  $\delta_{conn} = (S - H)/S$ , where  $S$  is the connectivity of a neuron in the symmetric configuration and  $H$  is the connectivity of the same neuron in the homogeneous configuration. That is,  $\delta_{conn}$  gives an estimate of the change in connectivity of a neuron relative to its connectivity in the homogeneous configuration. **Left** Average  $\delta_{conn}$  for I-networks (average over all the neurons in the network). **Right** Same as in the left panel, but for EI-networks. Forcing a neuron to make preferentially connections in the direction  $\phi$  increased its connectivity in that direction by a factor 1 and, correspondingly, the connectivity was reduced by the same amount in the opposite direction. This change in the opposite direction is because we achieved asymmetry by shifting the connectivity cloud in the direction specified by  $\phi$  (Figure 1). That is, in the immediate vicinity, the connection probability was doubled in the direction  $\phi$ . This increase may look very large, but it nevertheless was not large enough to alter the probability of multiple connections in the network (Fig. S1). In the Figure we also notice a connectivity increase and corresponding decrease at larger distance as well, but this was not of much consequence because at such large distances the connection probability was very small to begin with.



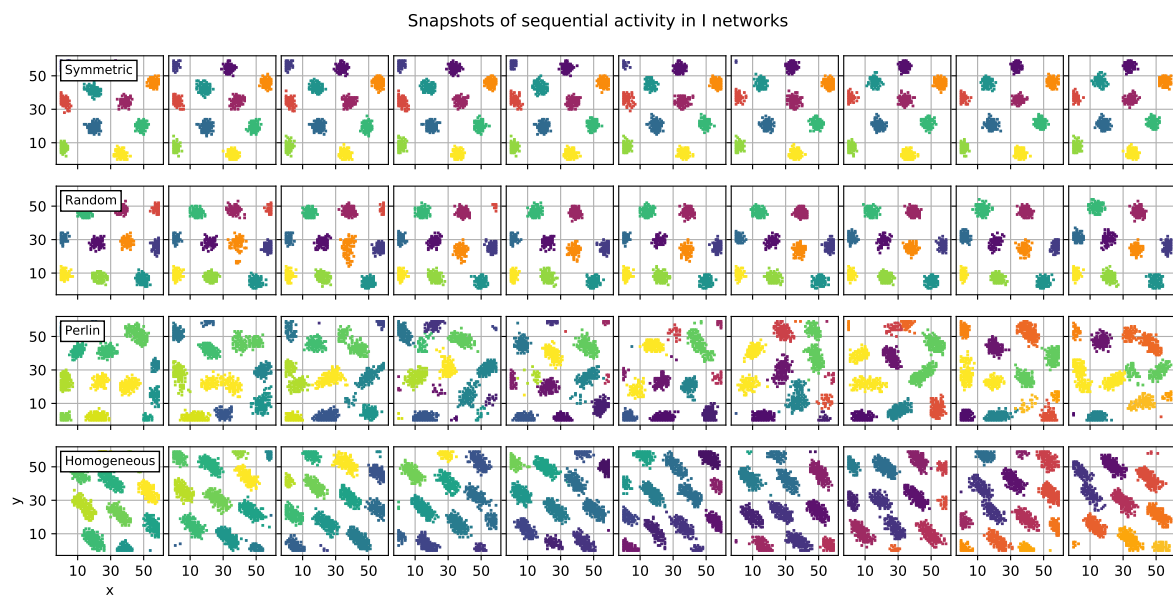

Figure S3: **Snapshots of the spiking activity in I-networks for the four different configurations.** Each row show the temporal evolution of the network activity for a different configuration. Each panel shows the activity of inhibitory neurons observed over a time window of 100 ms (disjoint windows), rendered in the two-dimensional network space. Each dot in a panel shows a spike of the neuron located at that grid point. Neurons are colored to identify individual spatio-temporal activity sequences (STAS). In each row, spikes rendered in the same color belong to the same STAS. Spikes that were not part of an STAS are not shown for clarity of presentation.

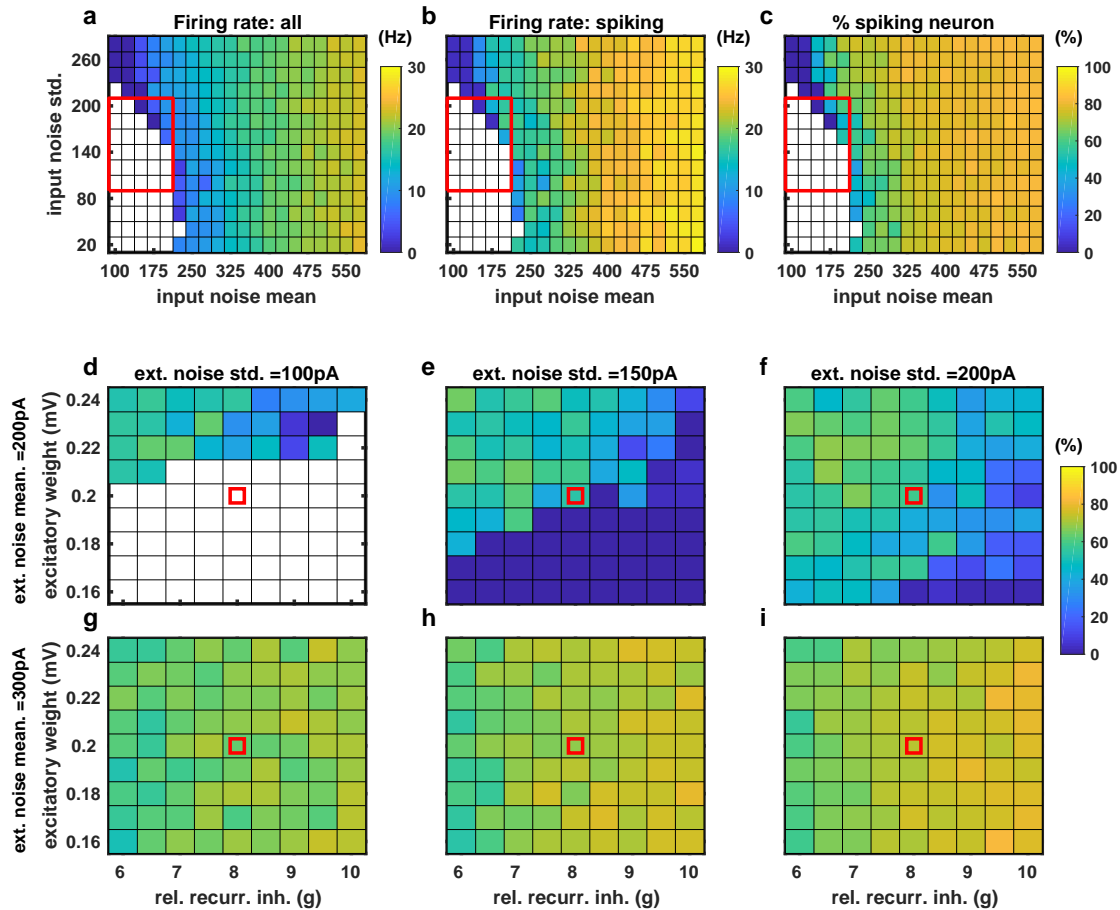

**Figure S4: Effect of input and excitation-inhibition balance on the emergence of spatio-temporal sequences in an EI-network.** (a) Average firing rate of all excitatory neurons as a function of the mean (x-axis) and standard deviation of the input noise to the neurons. (b) Same as in a, but here the average firing rates of only those excitatory neurons that spiked during an epoch of 2 sec is shown. (c) Fraction of excitatory neurons that spiked during an epoch of 2 sec. We used this fraction of spiking neuron as a proxy of STAS because, as shown in the main text, when networks were wired in the Perlin configuration, STASs emerged as soon as neurons crossed their spiking threshold. The value of EPSP amplitude and 'g' used for panels a-c are marked by the red square in panels d-i. (d) Fraction of excitatory neurons that spiked as a function of the EPSP amplitude (y-axis) and ratio of the amplitudes of IPSP and EPSPs 'g' (x-axis). Here we operated in an inhibition dominated regime. (e-i) Same as in panel d, but for different values of the input mean and standard deviation. The range of input mean and standard deviation used for panels d-i is marked by the red rectangle in panel a.

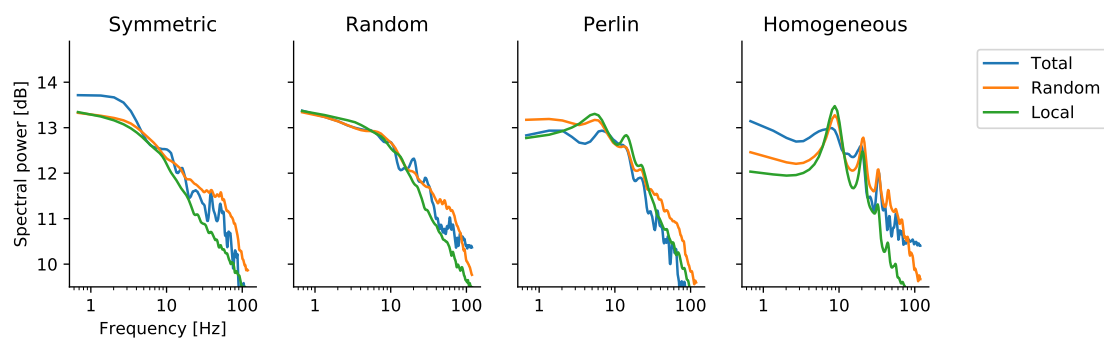

**Figure S5: Power spectra of EI-network activity in different spatial inhomogeneity configurations.** Power spectra of summed spiking activities of excitatory neurons (binwidth = 4ms), with different traces referring to the source of the data: the z-score of the spiking activity of the entire network population (blue trace), of 100 randomly selected neurons from the entire network (orange trace), and of the neurons located in a  $10 \times 10$  region in the network (green trace). The spectral power in all network models peaked at approx. 60 Hz (gamma-band oscillations). Additionally, in network models with homogeneous and Perlin configurations, an additional, weak low-frequency peak, at around 4-6 Hz, appeared.
